# Supplementary material
Source: publisher figshare collection journal article supplement (https://sage.figshare.com/ndownloader/files/17682380)
Supplement: Supplementary file 1 [file 17682380]

## **Example Story**

**Initial aggression:** An example scenario (physical aggression, female participant) is: “Let’s say Tiffany is pushed and hit all the time by some of Tiffany’s classmates during school. Tiffany does not know what to do about it.”

**Retribution:** An example scenario (physical aggression, female participant) is: “What if Tiffany decided to do something to hurt her classmates?”
